# Supplementary material for: Altered pituitary morphology as a sign of benign hereditary chorea caused by TITF1/NKX2.1 mutations
Source: PubMed Central journal article supplement (PMC8960566; doi:10.1007/s10048-021-00680-3), 2022-01-25

**Supplementary Figure 1.**

a.

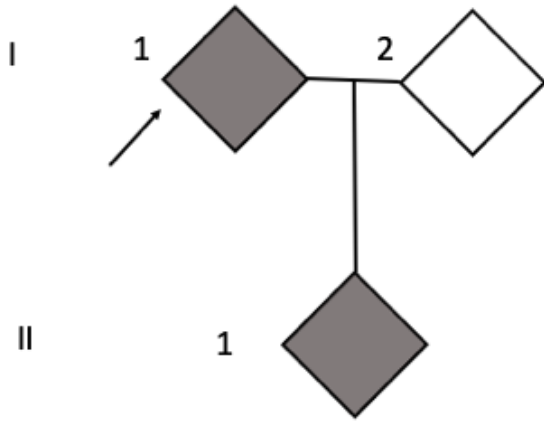

b.

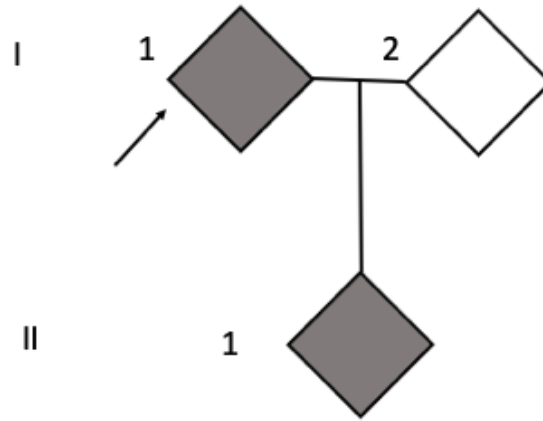

Supplement: 10048_2021_680_MOESM1_ESM.pdf [file 10048_2021_680_MOESM1_ESM.pdf]
